# Supplementary material for: The Association Between Maternal Cortisol and Infant Amygdala Volume Is Moderated by Socioeconomic Status
Source: PubMed Central journal article supplement — Biol Psychiatry Glob Open Sci. 2023 Mar 22;3(4):837–46. doi: 10.1016/j.bpsgos.2023.03.002 (PMC10593881; doi:10.1016/j.bpsgos.2023.03.002), 2023-03-22
Supplement: mmc1.pdf [file mmc1.pdf]

## **SUPPLEMENTARY INFORMATION**

### **The Association Between Maternal Cortisol and Infant Amygdala Volume Is Moderated by Socioeconomic Status**

Herzberg *et al.*

## Supplementary Methods

### *Participant Inclusion/Exclusion Criteria*

Exclusion criteria for the current study included women with multiple gestations, diagnosed maternal infections known to cause congenital disease, premature birth (<37 weeks estimated gestational age), low infant birthweight (<2,000 grams), infant spending more than 7 days in the neonatal intensive care unit, MRI-identified brain injury in the infant, maternal alcohol use during pregnancy, maternal drug use during pregnancy (excluding marijuana and tobacco), and maternal steroid use in any form as steroids are known to impact cortisol production. Participant questionnaires and chart review were used to collect medical data by trained staff.

Maternal tobacco and/or maternal cannabis use during pregnancy was not an exclusion for study enrollment nor inclusion in the analyses presented here. The reasoning for including participants who reported tobacco and/or cannabis use during pregnancy and covarying for their use in the statistical models was twofold: First, the population included in this sample has lower socioeconomic status than the vast majority of other research and has a higher degree of substance use. Excluding participants who used tobacco and cannabis during pregnancy would limit the number of high disadvantage included in the analysis, which we believe perpetuates a lack of research in very low-income populations. Second, we believe that our results are more generalizable to other low-income populations as a result of the inclusion of dyads reporting maternal tobacco and/or marijuana use. As such, we believe that their inclusion (with appropriate covariate treatment) is an important aspect of our study.

### *Socioeconomic disadvantage score measures.*

The socioeconomic disadvantage score was generated by reverse-coding the social advantage factor score generated by (1). This factor score was calculated using the following variables:

**Income-to-needs ratio** was calculated at each trimester and utilized self-reported family income and household size compared to federal poverty thresholds for families of the corresponding size. An income-to-needs ratio of 1.0 represents the poverty line.

**Insurance status** was collected at study enrollment via medical record review and was confirmed during the third trimester of pregnancy or at delivery. Possible insurance categories included Individual/Group, Medicaid, Medicare, VA/Military, or Uninsured.

**Maternal education level** was self-reported at study enrollment and included options for less than a high school degree, high school degree, college graduate, and post-graduate degree.

**Area deprivation index** was used to rank neighborhoods by socioeconomic disadvantage compared to the national average compared to census data and includes information about area income, education, employment, and housing quality (2,3).

**Maternal nutrition** was assessed during the third trimester or at delivery using the Healthy Eating Index. The Healthy Eating Index is a validated assessment available from the National Institutes of Health to measure diet quality based on U.S. Dietary Guidelines for Americans (4). The data used to calculate the Healthy Eating Index for each participant was collected using the Diet History Questionnaire (5,6).

#### ***Maternal psychosocial stress measures***

**Maternal perceived stress** Maternal perceived stress was measured once per trimester using Cohen's Perceived Stress Scale (7). The scale asked participants to rate the frequency of stressful events in the past month on a scale ranging from 0 = "Never" to 4 "Fairly Often." Items included, "*In the last month, how often have you been upset because of something that happened unexpectedly?*" and "*In the last month, how often have you felt confident about your ability to handle your personal problems?*" among others. Sum scores were created for each trimester, reverse scoring items as needed. Thus, possible scores ranged from 0 – 40 in each trimester.

**Maternal depression symptoms** The Edinburgh Postnatal Depression Scale was used to collect self-reported depression symptoms once per trimester (8). Participants were asked to report the frequency of depressive symptoms on a scale of 0 = "Hardly" at all to 3 = "Yes, quite a lot". Items included, "*I have been able to laugh and see the funny side of things*" and "*I have blamed myself unnecessarily when*

*things went wrong*”, among others. Sum scores were calculated for each trimester with items reverse scored as instructed. Possible scores ranged from 0 to 30.

**Stressful and traumatic life events** Self-reported stressful and traumatic life events during mothers’ lifetimes were collected using the Stress and Adversity Inventory for Adults (STRAIN; Slavich & Shields, 2018) at the time of the neonatal brain imaging session or at follow-up.

**Experiences of discrimination** The Everyday Discrimination Scale (10) was completed by caregivers at the time of the neonatal brain imaging visit and used to measure experiences of discrimination based on race.

### ***Factor score generation***

The maternal socioeconomic disadvantage factor score included measures of income to needs ratio, insurance status, mother’s highest level of education, area deprivation index, and maternal nutrition. For maternal psychosocial stress, measures of perceived stress, self-reported depression symptoms, self-reported traumatic life events, and experiences of discrimination were included in the factor score. The confirmatory factor analysis that generated the latent score was completed in MPlus (version 8.4; 11) and the full model can be seen in Figure S3. Fit indices indicated good fit to the data and the two-factor model outperformed one-factor and three-factor alternatives. More detailed methods of the confirmatory factor analysis can be found in (1).

### ***Cortisol Sampling, Processing, and Data Preparation***

**Cortisol Sampling.** Participants provided salivary samples (Salimetrics, United Kingdom) collected every four hours for 24 hours each trimester, starting at 18:00 hr. Participants received seven Salivette tubes (Sarstedt SAR-511534500) and the following instructions on how to collect saliva specimens at home. Participants were asked to collect clear saliva samples free of contamination with food, lipstick, blood, or other extraneous materials at least 30 – 60 minutes after a meal, oral intake of pharmaceutical drugs, or tooth cleaning. To collect saliva, participants were asked to remove the swab from the tube without touching it with their hands, insert it into their mouths, and gently chew until the

mouth salivated. Swabs were then returned to the suspended insert in the tube using their teeth to avoid touching it with their hands. Research staff called or texted participants once on the day of specimen collection to remind them of instructions for saliva collection and to bring completed saliva kits to subsequent visits. Participants labeled samples with the date and time upon sample completion, sealed them, and stored samples in a -20°C freezer at their home until delivered to study staff. Once received, the samples were timestamped, frozen, and processed for analysis of cortisol concentrations by ELISA (Salimetrics Melatonin EIA kit and Salimetrics Cortisol ELISA kits) at Washington University School of Medicine. Figure S1 shows the distribution of the difference between actual collection time and the instructed collection time. Participant compliance with collection time was high, as can be seen in the figure. Additionally, the data reduction technique used for the cortisol data (Area Under the Curve with Respect to Ground, see below) is agnostic to sample timing and uses the actual interval between samples when estimating total cortisol production.

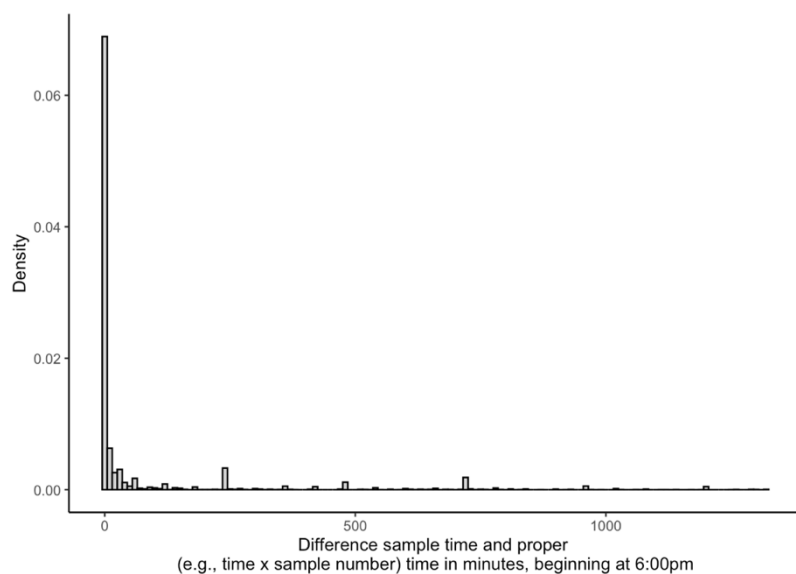

**Figure S1.** Density plot of the difference in minutes between instructed cortisol sample time and participant-reported sample time. Participants generally collected the samples within an hour of the appointed time.

**Cortisol Processing.** Upon receipt of the saliva, samples were thawed and centrifuged for two minutes at 1000x g. The one mL samples were aliquoted into cryovials (Corning 2.0 ml external thread #430659) and stored at -80°C until assayed. Prior to assay the aliquoted saliva samples were thawed, spun at 1500g for 15 minutes, and analyzed with a Salimetrics Saliva Cortisol ELISA kit (Salimetrics 1-3002-5) using manufacturer instructions. All samples were assayed in duplicate with measurements read on a BioTek Eon plate reader using Gen5 (version 2.07) software. Absorbance was measured at 450 nm and 620 nm. Sample concentrations were calculated according to a standard curve with cortisol concentrations between 0.12 ng/mL and 30 ng/mL. The lower limit sensitivity (i.e., the lowest cortisol concentration that can be distinguished from 0) was 0.07 ng/mL. Samples with concentrations above 30 ng/mL were diluted and re-assayed until values fit within the standard curve and then the concentration values were corrected based on dilution. The intra- and inter-assay CV in the duplicate assays were 4.6% and 6%, respectively. Individual sets of saliva samples with 5 or more samples were included in subsequent analyses, resulting in the exclusion of 17 sets of saliva samples (first trimester=7 exclusions, second trimester=6 exclusions, third trimester=4 exclusions). Participants provided the requested saliva samples at a very high rate, generally, resulting in very little missingness: 60 of 1,467 possible samples were missing in trimester 1; 92 of 2,518 were missing in trimester 2; and 89 of 2,384 in trimester 3.

**Cortisol Data Preparation.** Raw cortisol data were hand-cleaned to ensure accuracy and outliers were winsorized to the highest value less than 5 standard deviations from the mean (18.47ng/mL) if they fell outside this cut-off. This winsorization was completed due to some values falling outside the range of physiological plausibility and included 25 total data points, 2 in the first trimester, 8 in the second trimester, and 15 in the third trimester. This cut-off value was chosen to include as much original data as possible while allowing for variability that may be due to physiological changes during pregnancy (the normal range is approximately 11–12 ng/mL; Laudat et al., 1988). Area under the curve with respect to ground (AUCg) was then calculated as a measure of total cortisol production over the 24-hour saliva collection period (13). One AUCg value was calculated for each trimester in most cases. However, some participants completed two sets of saliva samples within the same trimester. In these cases, the average of

the two AUCg values within the same trimester was used for data analysis (Table S1 includes the number of averaged samples and the number of participants providing cortisol samples in each trimester).

Descriptive statistics for cortisol AUCg by trimester can be found in Table 2. The resulting distribution of AUCg values was right-skewed and exhibited a high degree of positive kurtosis. To address these issues and meet the normality assumptions of the planned data analysis, AUCg values were log-10 transformed and one outlier AUCg observation, more than 5 standard deviations below the sample mean, was removed. The distribution met normality assumptions following transformation as skewness and kurtosis estimates fell within acceptable ranges (skewness=-0.02; kurtosis =1.41; Curran et al., 1996). Model results did not differ significantly with alternative outlier specifications (e.g. removal of AUCg observations +/- 3sd from the mean, no outliers removed) as can be seen in Tables S2 and S3.

## Supplementary Results

### *Number of averaged AUCg values by trimester*

**Table S1.** Number of participants providing saliva samples for each trimester or set of trimesters and the number of participants for whom two AUCg values were averaged in the same trimester. For example, 21 participants provided samples in trimester 1 and trimester 3 only, while 80 participants provided samples in trimester 2 and trimester 3 only. One hundred eight participants provided samples in all trimesters.

|                         | <b>T1</b> | <b>T2</b> | <b>T3</b> | <b>T1, T2, &amp; T3</b> | <b>Averaged<br/>AUCg Values</b> |
|-------------------------|-----------|-----------|-----------|-------------------------|---------------------------------|
| <b>T1</b>               | 4         |           |           |                         | 0                               |
| <b>T2</b>               | 5         | 15        |           |                         | 29                              |
| <b>T3</b>               | 21        | 80        | 8         |                         | 23                              |
| <b>T1, T2, &amp; T3</b> |           |           |           | 108                     | 52                              |

***Differences between the full sample and the final model sample***

**Table S2.** Demographics of participants excluded from the final model for providing only one set of saliva samples across pregnancy and those included in the model (e.g., provided two or more sets of saliva samples). P-values in the right-hand column were generated using t-tests for continuous variables and chi-square tests for categorical variables.

|                                                | <b>Excluded<br/>(N=19)</b> | <b>Included<br/>(N=222)</b> | <b>P-<br/>value</b> |
|------------------------------------------------|----------------------------|-----------------------------|---------------------|
| <b>Infant Sex</b>                              |                            |                             |                     |
| Male                                           | 8 (42.1%)                  | 120 (54.1%)                 | 0.346               |
| Female                                         | 11 (57.9%)                 | 102 (45.9%)                 |                     |
| <b>Infant Age at Scan</b>                      |                            |                             |                     |
| Mean (SD)                                      | 41.6 (1.21)                | 41.3 (1.26)                 | 0.282               |
| Median [Min, Max]                              | 42.0 [39.0, 43.0]          | 41.0 [38.0, 45.0]           |                     |
| <b>Infant Birthweight</b>                      |                            |                             |                     |
| Mean (SD)                                      | 3180 (503)                 | 3250 (487)                  | 0.578               |
| Median [Min, Max]                              | 3160 [2370, 4130]          | 3190 [2270, 4610]           |                     |
| <b>Race/Ethnicity</b>                          |                            |                             |                     |
| Black                                          | 12 (63.2%)                 | 127 (57.2%)                 | 0.448               |
| White                                          | 6 (31.6%)                  | 87 (39.2%)                  |                     |
| Asian                                          | 1 (5.3%)                   | 3 (1.4%)                    |                     |
| Native Hawaiian/Pacific Islander               | 0 (0%)                     | 0 (0%)                      |                     |
| American Indian/ Alaskan Native                | 0 (0%)                     | 0 (0%)                      |                     |
| Other                                          | 0 (0%)                     | 5 (2.3%)                    |                     |
| Unknown                                        | 0 (0%)                     | 0 (0%)                      |                     |
| <b>First Trimester INR</b>                     |                            |                             |                     |
| Mean (SD)                                      | 2.46 (3.00)                | 3.13 (3.10)                 | 0.364               |
| Median [Min, Max]                              | 1.24 [0.500, 11.8]         | 1.54 [0.430, 12.2]          |                     |
| Missing                                        | 0 (0%)                     | 2 (0.9%)                    |                     |
| <b>Socioeconomic Disadvantage Factor Score</b> |                            |                             |                     |
| Mean (SD)                                      | 0.109 (0.981)              | -0.144 (0.983)              | 0.294               |
| Median [Min, Max]                              | 0.379 [-1.90, 1.37]        | 0.263 [-2.15, 1.47]         |                     |
| <b>Psychosocial Stress Factor Score</b>        |                            |                             |                     |
| Mean (SD)                                      | 0.245 (1.24)               | -0.175 (0.848)              | 0.165               |
| Median [Min, Max]                              | -0.109 [-1.21, 2.61]       | -0.351 [-1.68, 3.66]        |                     |
| <b>Maternal Insurance Status</b>               |                            |                             |                     |
| Medicaid                                       | 8 (42.1%)                  | 70 (31.5%)                  | 0.62                |
| Medicare                                       | 0 (0%)                     | 6 (2.7%)                    |                     |



|                                 | <b>Excluded<br/>(N=19)</b> | <b>Included<br/>(N=222)</b> | <b>P-<br/>value</b> |
|---------------------------------|----------------------------|-----------------------------|---------------------|
| Individual or Group             | 10 (52.6%)                 | 122 (55.0%)                 |                     |
| Uninsured                       | 1 (5.3%)                   | 24 (10.8%)                  |                     |
| <b>Maternal Age at Delivery</b> |                            |                             |                     |
| Mean (SD)                       | 27.7 (6.32)                | 29.3 (5.23)                 | 0.297               |
| Median [Min, Max]               | 26.9 [19.0, 40.5]          | 29.0 [18.7, 41.8]           |                     |
| <b>Amygdala Volume</b>          |                            |                             |                     |
| Mean (SD)                       | 926 (70.2)                 | 911 (99.8)                  | 0.382               |
| Median [Min, Max]               | 936 [819, 1030]            | 905 [627, 1340]             |                     |
| <b>Total Gray Matter Volume</b> |                            |                             |                     |
| Mean (SD)                       | 123000 (13200)             | 121000 (15200)              | 0.497               |
| Median [Min, Max]               | 124000 [95700,<br>142000]  | 120000 [79600,<br>168000]   |                     |

### ***Robustness to outlier specification***

To confirm that the significant interaction between socioeconomic disadvantage and cortisol slope across pregnancy predicting neonatal amygdala volumes was not due to the treatment of the outlier observation, the model was re-run using two alternative outlier treatments: 1) removing all observations  $\pm 3$  standard deviations from the mean and 2) no outlier removal. The results of these models did not differ from the model presented in the main manuscript, in which one observation five standard deviations from the mean was removed. Full model results for these alternative model specifications are presented in Tables S3 and S4.

**Table S3.** Coefficient-level estimates for a model fitted to estimate variation in average amygdala volume. Only outliers  $\pm 3sd$  from the mean of cortisol slope were removed in this model specification and results are consistent with those presented in the main manuscript.

| Outcome = Bilateral Amygdala Volume  |         |                |       |        |
|--------------------------------------|---------|----------------|-------|--------|
| Predictor                            | $\beta$ | 95% CI         | t     | p      |
| Intercept                            | -0.01   | [-0.08, 0.07]  | 3.31  | 0.001  |
| Cortisol Slope                       | 0.04    | [-0.03, 0.12]  | 0.65  | 0.517  |
| Disadvantage Factor                  | -0.13   | [-0.22, -0.04] | 2.36  | 0.019  |
| Infant Age at Scan                   | -0.03   | [-0.12, 0.06]  | -0.64 | 0.525  |
| Infant Sex                           | -0.09   | [-0.17, -0.01] | -2.15 | 0.033  |
| Infant Birthweight                   | -0.06   | [-0.15, 0.02]  | -1.44 | 0.150  |
| Total Gray Matter Volume             | 0.78    | [0.67, 0.89]   | 14.19 | <0.001 |
| Maternal Tobacco Use                 | -0.08   | [-0.16, -0.01] | -2.12 | 0.035  |
| Maternal Cannabis Use                | 0.07    | [-0.01, 0.16]  | 1.70  | 0.090  |
| Cortisol Slope x Disadvantage Factor | -0.13   | [-0.21, -0.04] | -3.03 | 0.003  |

**Table S4.** Coefficient-level estimates for a model fitted to estimate variation in average amygdala volume. No outliers were removed in this model specification and results are consistent with those presented in the main manuscript.

| Outcome = Bilateral Amygdala Volume  |         |                |       |        |
|--------------------------------------|---------|----------------|-------|--------|
| Predictor                            | $\beta$ | 95% CI         | t     | p      |
| Intercept                            | 0.01    | [-0.06, 0.08]  | 3.58  | <0.001 |
| Cortisol Slope                       | 0.04    | [-0.03, 0.12]  | 0.60  | 0.550  |
| Disadvantage Factor                  | -0.15   | [-0.24, -0.06] | 1.53  | 0.128  |
| Infant Age at Scan                   | -0.03   | [-0.12, 0.06]  | -0.72 | 0.474  |
| Infant Sex                           | -0.10   | [-0.18, -0.02] | -2.54 | 0.012  |
| Infant Birthweight                   | -0.07   | [-0.15, 0.02]  | -1.53 | 0.127  |
| Total Gray Matter Volume             | 0.77    | [0.66, 0.88]   | 14.27 | <0.001 |
| Maternal Tobacco Use                 | -0.08   | [-0.16, 0]     | -2.06 | 0.040  |
| Maternal Cannabis Use                | 0.08    | [0, 0.16]      | 1.88  | 0.062  |
| Cortisol Slope x Disadvantage Factor | -0.16   | [-0.24, -0.08] | -3.90 | <0.001 |

**Multi-level Model Output**

**Table S5.** Results of multi-level model assessing cortisol production by trimester with random effects for intercept and slope

| Effect Type | Grouping Variable | Predictor                  | B     | SE   | t      | CI Lower Bound | CI Upper Bound |
|-------------|-------------------|----------------------------|-------|------|--------|----------------|----------------|
| Fixed       |                   | Intercept                  | 8.52  | 0.07 | 129.78 | 8.39           | 8.65           |
| Fixed       |                   | Trimester                  | 0.02  | 0.00 | 8.55   | 0.02           | 0.03           |
| Random      | subID             | Intercept SD               | 0.49  |      |        |                |                |
| Random      | subID             | Cor: Intercept x Trimester | -0.66 |      |        |                |                |
| Random      | subID             | Trimester SD               | 0.02  |      |        |                |                |
| Random      | Residual          | Residual                   | 0.63  |      |        |                |                |

### *Left- and right-amygdala volume model*

The pattern of results is consistent when models are fit to models with left- and right-amygdala volumes separately. Model results are in Tables S6 and S7 below.

**Table S6.** Coefficient-level estimates for a model fitted to estimate variation in left amygdala volume. One outlier -5 sd from the mean of cortisol AUCg was removed.

| Outcome = Left Amygdala Volume       |         |                |       |        |
|--------------------------------------|---------|----------------|-------|--------|
| Predictor                            | $\beta$ | 95% CI         | t     | p      |
| Intercept                            | 0.01    | [-0.07, 0.08]  | 2.98  | 0.003  |
| Cortisol Slope                       | 0.05    | [-0.03, 0.13]  | 0.85  | 0.398  |
| Disadvantage Factor                  | -0.14   | [-0.24, -0.04] | 1.81  | 0.072  |
| Infant Age at Scan                   | -0.01   | [-0.11, 0.08]  | -0.31 | 0.760  |
| Infant Sex                           | -0.10   | [-0.18, -0.02] | -2.36 | 0.019  |
| Infant Birthweight                   | -0.09   | [-0.18, 0]     | -1.98 | 0.049  |
| Total Gray Matter Volume             | 0.74    | [0.63, 0.86]   | 12.74 | <0.001 |
| Maternal Tobacco Use                 | -0.09   | [-0.17, -0.01] | -2.10 | 0.037  |
| Maternal Cannabis Use                | 0.07    | [-0.02, 0.16]  | 1.47  | 0.144  |
| Cortisol Slope x Disadvantage Factor | -0.14   | [-0.23, -0.06] | -3.35 | <0.001 |

**Table S7.** Coefficient-level estimates for a model fitted to estimate variation in right amygdala volume. One outlier -5 sd from the mean of cortisol AUCg was removed.

| Outcome = Right Amygdala Volume      |         |                |       |        |
|--------------------------------------|---------|----------------|-------|--------|
| Predictor                            | $\beta$ | 95% CI         | t     | p      |
| Intercept                            | 0.01    | [-0.07, 0.08]  | 3.61  | <0.001 |
| Cortisol Slope                       | 0.03    | [-0.05, 0.1]   | 0.19  | 0.851  |
| Disadvantage Factor                  | -0.14   | [-0.23, -0.04] | 1.79  | 0.075  |
| Infant Age at Scan                   | -0.05   | [-0.14, 0.04]  | -1.03 | 0.303  |
| Infant Sex                           | -0.09   | [-0.17, -0.01] | -2.18 | 0.031  |
| Infant Birthweight                   | -0.04   | [-0.12, 0.05]  | -0.80 | 0.425  |
| Total Gray Matter Volume             | 0.77    | [0.66, 0.88]   | 13.82 | <0.001 |
| Maternal Tobacco Use                 | -0.07   | [-0.15, 0.01]  | -1.77 | 0.079  |
| Maternal Cannabis Use                | 0.08    | [0, 0.17]      | 1.93  | 0.055  |
| Cortisol Slope x Disadvantage Factor | -0.14   | [-0.22, -0.06] | -3.35 | <0.001 |

**Table S8.** Coefficient-level estimates for a model fitted to estimate variation in bilateral amygdala volume with gestational age as a covariate. One outlier -5 sd from the mean of cortisol AUCg was removed.

| Outcome = Bilateral Amygdala Volume  |         |                |       |        |
|--------------------------------------|---------|----------------|-------|--------|
| Predictor                            | $\beta$ | 95% CI         | t     | p      |
| Intercept                            | 0.01    | [-0.06, 0.08]  | 2.74  | 0.007  |
| Cortisol Slope                       | 0.04    | [-0.04, 0.11]  | 0.48  | 0.632  |
| Disadvantage Factor                  | -0.14   | [-0.23, -0.04] | 2.08  | 0.038  |
| Infant Age at Scan                   | -0.02   | [-0.11, 0.08]  | -0.38 | 0.702  |
| Infant Sex                           | -0.10   | [-0.18, -0.02] | -2.45 | 0.015  |
| Infant Gestational Age               | -0.02   | [-0.1, 0.06]   | -0.45 | 0.652  |
| Total Gray Matter Volume             | 0.74    | [0.64, 0.84]   | 14.57 | <0.001 |
| Maternal Tobacco Use                 | -0.08   | [-0.15, 0.00]  | -1.99 | 0.048  |
| Maternal Cannabis Use                | 0.08    | [0, 0.17]      | 1.99  | 0.048  |
| Cortisol Slope x Disadvantage Factor | -0.15   | [-0.23, -0.07] | -3.68 | <0.001 |

**Table S9.** Coefficient-level estimates for a model fitted to estimate variation in average amygdala volume. Outliers 5 sd from the mean (N = 1) and participants with winsorized cortisol samples (N = 10) removed.

| Outcome = Bilateral Amygdala Volume  |         |                |       |        |
|--------------------------------------|---------|----------------|-------|--------|
| Predictor                            | $\beta$ | 95% CI         | t     | p      |
| Intercept                            | 0.00    | [-0.07, 0.08]  | 3.33  | 0.001  |
| Cortisol Slope                       | 0.06    | [-0.02, 0.13]  | 0.99  | 0.324  |
| Disadvantage Factor                  | -0.14   | [-0.24, -0.05] | 1.79  | 0.075  |
| Infant Age at Scan                   | -0.02   | [-0.11, 0.07]  | -0.40 | 0.692  |
| Infant Sex                           | -0.11   | [-0.19, -0.03] | -2.68 | 0.008  |
| Infant Birthweight                   | -0.08   | [-0.16, 0.01]  | -1.79 | 0.076  |
| Total Gray Matter Volume             | 0.76    | [0.65, 0.87]   | 13.77 | <0.001 |
| Tobacco Use                          | -0.08   | [-0.16, 0]     | -2.04 | 0.043  |
| Cannabis Use                         | 0.08    | [0, 0.17]      | 1.95  | 0.052  |
| Cortisol Slope x Disadvantage Factor | -0.14   | [-0.22, -0.06] | -3.43 | <0.001 |

***Hippocampus, caudate, and medial prefrontal cortex models***

There were no significant interactions of cortisol slope across pregnancy and socioeconomic disadvantage in the hippocampus, caudate, or medial prefrontal cortex. Full model results are below in Tables S10 – S12.

**Table S10.** Coefficient-level estimates for a model fitted to estimate variation in average hippocampus volume. One outlier -5 sd from the mean of cortisol AUCg was removed.

| Outcome = Bilateral Hippocampus Volume |         |               |       |        |
|----------------------------------------|---------|---------------|-------|--------|
| Predictor                              | $\beta$ | 95% CI        | t     | p      |
| Intercept                              | 0.00    | [-0.1, 0.1]   | 1.92  | 0.057  |
| Cortisol Slope                         | 0.11    | [0.01, 0.22]  | 1.93  | 0.055  |
| Disadvantage Factor                    | -0.10   | [-0.23, 0.03] | 0.82  | 0.413  |
| Infant Age at Scan                     | 0.00    | [-0.13, 0.13] | 0.01  | 0.994  |
| Infant Sex                             | 0.01    | [-0.1, 0.12]  | 0.13  | 0.896  |
| Infant Birthweight                     | -0.06   | [-0.18, 0.06] | -1.03 | 0.304  |
| Total Gray Matter Volume               | 0.63    | [0.48, 0.78]  | 8.18  | <0.001 |
| Maternal Tobacco Use                   | -0.06   | [-0.16, 0.05] | -1.02 | 0.307  |
| Maternal Cannabis Use                  | -0.00   | [-0.12, 0.11] | -0.08 | 0.936  |
| Cortisol Slope x Disadvantage Factor   | -0.09   | [-0.2, 0.02]  | -1.63 | 0.106  |

**Table S11.** Coefficient-level estimates for a model fitted to estimate variation in average caudate volume. One outlier -5 sd from the mean of cortisol AUCg was removed.

| Outcome = Bilateral Caudate Volume   |         |                |       |        |
|--------------------------------------|---------|----------------|-------|--------|
| Predictor                            | $\beta$ | 95% CI         | t     | p      |
| Intercept                            | 0.00    | [-0.1, 0.1]    | 0.27  | 0.784  |
| Cortisol Slope                       | -0.05   | [-0.15, 0.06]  | -0.95 | 0.345  |
| Disadvantage Factor                  | -0.15   | [-0.28, -0.02] | -0.78 | 0.437  |
| Infant Age at Scan                   | 0.07    | [-0.06, 0.2]   | 1.09  | 0.278  |
| Infant Sex                           | 0.01    | [-0.1, 0.12]   | 0.13  | 0.899  |
| Infant Birthweight                   | 0.01    | [-0.11, 0.13]  | 0.20  | 0.845  |
| Total Gray Matter Volume             | 0.53    | [0.38, 0.68]   | 6.94  | <0.001 |
| Maternal Tobacco Use                 | -0.10   | [-0.21, 0.01]  | -1.87 | 0.062  |
| Maternal Cannabis Use                | 0.07    | [-0.05, 0.19]  | 1.16  | 0.249  |
| Cortisol Slope x Disadvantage Factor | -0.02   | [-0.13, 0.09]  | -0.30 | 0.762  |



**Table S12.** Coefficient-level estimates for a model fitted to estimate variation in average medial prefrontal cortex volume. One outlier -5sd from the mean of cortisol AUCg was removed.

| Outcome = Bilateral mPFC Volume      |         |                |       |        |
|--------------------------------------|---------|----------------|-------|--------|
| Predictor                            | $\beta$ | 95% CI         | t     | p      |
| Intercept                            | -0.00   | [-0.07, 0.06]  | 3.40  | <0.001 |
| Cortisol Slope                       | 0.04    | [-0.03, 0.11]  | 1.36  | 0.174  |
| Disadvantage Factor                  | 0.12    | [0.03, 0.2]    | 0.16  | 0.877  |
| Infant Age at Scan                   | -0.16   | [-0.24, -0.08] | -3.83 | <0.001 |
| Infant Sex                           | 0.04    | [-0.04, 0.11]  | 0.96  | 0.338  |
| Infant Birthweight                   | 0.02    | [-0.06, 0.1]   | 0.47  | 0.639  |
| Total Gray Matter Volume             | 1.00    | [0.9, 1.09]    | 19.91 | <0.001 |
| Maternal Tobacco Use                 | -0.00   | [-0.07, 0.07]  | -0.03 | 0.977  |
| Maternal Cannabis Use                | -0.05   | [-0.12, 0.03]  | -1.18 | 0.239  |
| Cortisol Slope x Disadvantage Factor | 0.04    | [-0.03, 0.12]  | 1.20  | 0.232  |

### *Trimester-specific cortisol x amygdala volume models*

Uncorrected trimester-specific models for the relationship between prenatal maternal cortisol and neonatal amygdala volume are presented below (Tables S13 – S15). Significant interactions were present in trimester 2 and 3 only.

**Table S13.** Coefficient-level estimates for a model fitted to estimate variation in neonatal amygdala volume using first trimester AUCg. One outlier -5sd from the mean of cortisol AUCg was removed.

| Outcome = Bilateral Amygdala Volume |         |                |       |        |
|-------------------------------------|---------|----------------|-------|--------|
| Predictor                           | $\beta$ | 95% CI         | t     | p      |
| Intercept                           | -0.01   | [-0.1, 0.08]   | 2.76  | 0.007  |
| AUCg T1                             | -0.04   | [-0.13, 0.06]  | -0.18 | 0.855  |
| Disadvantage Factor                 | -0.10   | [-0.22, 0.02]  | -2.47 | 0.015  |
| Infant Age at Scan                  | -0.04   | [-0.16, 0.08]  | -0.66 | 0.511  |
| Infant Sex                          | -0.07   | [-0.17, 0.02]  | -1.50 | 0.136  |
| Infant Birthweight                  | -0.06   | [-0.17, 0.06]  | -0.99 | 0.326  |
| Total Gray Matter Volume            | 0.80    | [0.66, 0.94]   | 11.47 | <0.001 |
| Maternal Tobacco Use                | -0.12   | [-0.22, -0.02] | -2.42 | 0.017  |
| Maternal Cannabis Use               | 0.03    | [-0.08, 0.14]  | 0.55  | 0.582  |
| AUCg T1 x Disadvantage Factor       | 0.09    | [-0.01, 0.19]  | 1.79  | 0.076  |

**Table S14.** Coefficient-level estimates for a model fitted to estimate variation in neonatal amygdala volume using second trimester AUCg. One outlier -5sd from the mean of cortisol AUCg was removed.

| Outcome = Bilateral Amygdala Volume |         |                |       |        |
|-------------------------------------|---------|----------------|-------|--------|
| Predictor                           | $\beta$ | 95% CI         | t     | p      |
| Intercept                           | 0.02    | [-0.06, 0.1]   | 3.87  | <0.001 |
| AUCg T2                             | 0.06    | [-0.03, 0.15]  | 0.88  | 0.381  |
| Disadvantage Factor                 | -0.17   | [-0.27, -0.07] | -0.04 | 0.968  |
| Infant Age at Scan                  | -0.07   | [-0.16, 0.03]  | -1.39 | 0.167  |
| Infant Sex                          | -0.08   | [-0.17, 0]     | -1.97 | 0.050  |
| Infant Birthweight                  | -0.07   | [-0.16, 0.02]  | -1.43 | 0.155  |
| Total Gray Matter Volume            | 0.79    | [0.68, 0.9]    | 13.93 | <0.001 |
| Maternal Tobacco Use                | -0.07   | [-0.16, 0.01]  | -1.71 | 0.089  |
| Maternal Cannabis Use               | 0.09    | [0, 0.18]      | 1.97  | 0.050  |
| AUCg T2 x Disadvantage Factor       | -0.10   | [-0.19, -0.01] | -2.16 | 0.032  |

**Table S15.** Coefficient-level estimates for a model fitted to estimate variation in neonatal amygdala volume using third trimester AUCg. One outlier -5sd from the mean of cortisol AUCg was removed.

| Outcome = Bilateral Amygdala Volume |         |                |       |        |
|-------------------------------------|---------|----------------|-------|--------|
| Predictor                           | $\beta$ | 95% CI         | t     | p      |
| Intercept                           | 0.01    | [-0.06, 0.09]  | 3.81  | <0.001 |
| AUCg T3                             | 0.01    | [-0.07, 0.09]  | -0.30 | 0.762  |
| Disadvantage Factor                 | -0.16   | [-0.25, -0.06] | 1.07  | 0.286  |
| Infant Age at Scan                  | -0.05   | [-0.14, 0.05]  | -0.98 | 0.330  |
| Infant Sex                          | -0.08   | [-0.16, 0]     | -1.91 | 0.057  |
| Infant Birthweight                  | -0.07   | [-0.16, 0.02]  | -1.49 | 0.139  |
| Total Gray Matter Volume            | 0.78    | [0.67, 0.89]   | 13.84 | <0.001 |
| Maternal Tobacco Use                | -0.09   | [-0.17, -0.01] | -2.24 | 0.026  |
| Maternal Cannabis Use               | 0.08    | [-0.01, 0.16]  | 1.77  | 0.078  |
| AUCg T3 x Disadvantage Factor       | -0.16   | [-0.25, -0.07] | -3.47 | <0.001 |

### *Cortisol intercept models*

There were no significant effects when cortisol intercepts were used in place of cortisol slopes. Cortisol intercept represents first trimester cortisol AUCg for each participant as the multilevel models used centered trimester as the time variable such that the first trimester was equal to zero. Full model results for each brain region of interest using the outlier specifications presented in the main manuscript (e.g., removing one observation  $\pm 5$  standard deviations from the mean) are below in Tables S16 – S19.

**Table S16.** Coefficient-level estimates for a model fitted to estimate variation in average amygdala volume. One outlier -5sd from the mean of cortisol AUCg was removed.

| Outcome = Bilateral Amygdala Volume      |         |                |       |        |
|------------------------------------------|---------|----------------|-------|--------|
| Predictor                                | $\beta$ | 95% CI         | t     | p      |
| Intercept                                | 0.00    | [-0.07, 0.08]  | 2.33  | 0.021  |
| Cortisol Intercept                       | 0.01    | [-0.07, 0.08]  | 0.13  | 0.896  |
| Disadvantage Factor                      | -0.13   | [-0.23, -0.04] | 0.49  | 0.628  |
| Infant Age at Scan                       | -0.04   | [-0.13, 0.05]  | -0.82 | 0.416  |
| Infant Sex                               | -0.10   | [-0.18, -0.02] | -2.34 | 0.020  |
| Infant Birthweight                       | -0.08   | [-0.16, 0.01]  | -1.72 | 0.086  |
| Total Gray Matter Volume                 | 0.79    | [0.68, 0.9]    | 14.15 | <0.001 |
| Maternal Tobacco Use                     | -0.09   | [-0.17, -0.01] | -2.25 | 0.026  |
| Maternal Cannabis Use                    | 0.06    | [-0.02, 0.15]  | 1.43  | 0.156  |
| Cortisol Intercept x Disadvantage Factor | -0.02   | [-0.1, 0.06]   | -0.57 | 0.572  |

**Table S17.** Coefficient-level estimates for a model fitted to estimate variation in average hippocampus volume. One outlier -5sd from the mean of cortisol AUCg was removed.

| Outcome = Bilateral Hippocampus Volume   |         |               |       |        |
|------------------------------------------|---------|---------------|-------|--------|
| Predictor                                | $\beta$ | 95% CI        | t     | p      |
| Intercept                                | 0.01    | [-0.1, 0.11]  | 1.72  | 0.086  |
| Cortisol Intercept                       | -0.03   | [-0.14, 0.07] | -0.67 | 0.506  |
| Disadvantage Factor                      | -0.08   | [-0.22, 0.05] | 0.56  | 0.574  |
| Infant Age at Scan                       | 0.01    | [-0.11, 0.14] | 0.21  | 0.834  |
| Infant Sex                               | 0.01    | [-0.11, 0.12] | 0.13  | 0.898  |
| Infant Birthweight                       | -0.07   | [-0.19, 0.06] | -1.06 | 0.290  |
| Total Gray Matter Volume                 | 0.63    | [0.48, 0.78]  | 8.14  | <0.001 |
| Maternal Tobacco Use                     | -0.06   | [-0.17, 0.05] | -1.03 | 0.305  |
| Maternal Cannabis Use                    | -0.01   | [-0.13, 0.11] | -0.16 | 0.875  |
| Cortisol Intercept x Disadvantage Factor | -0.03   | [-0.15, 0.08] | -0.60 | 0.550  |

**Table S18.** Coefficient-level estimates for a model fitted to estimate variation in average caudate volume. One outlier -5sd from the mean of cortisol AUCg was removed.

| Outcome = Bilateral Caudate Volume       |         |                |       |        |
|------------------------------------------|---------|----------------|-------|--------|
| Predictor                                | $\beta$ | 95% CI         | t     | p      |
| Intercept                                | 0.01    | [-0.1, 0.11]   | -0.17 | 0.868  |
| Cortisol Intercept                       | 0.04    | [-0.07, 0.14]  | 0.63  | 0.532  |
| Disadvantage Factor                      | -0.16   | [-0.29, -0.03] | 0.59  | 0.557  |
| Infant Age at Scan                       | 0.06    | [-0.07, 0.18]  | 0.90  | 0.370  |
| Infant Sex                               | 0.00    | [-0.11, 0.11]  | 0.02  | 0.982  |
| Infant Birthweight                       | 0.00    | [-0.11, 0.12]  | 0.08  | 0.939  |
| Total Gray Matter Volume                 | 0.54    | [0.39, 0.69]   | 7.04  | <0.001 |
| Maternal Tobacco Use                     | -0.11   | [-0.21, 0]     | -1.96 | 0.052  |
| Maternal Cannabis Use                    | 0.07    | [-0.05, 0.18]  | 1.10  | 0.272  |
| Cortisol Intercept x Disadvantage Factor | -0.04   | [-0.15, 0.07]  | -0.66 | 0.511  |

**Table S19.** Coefficient-level estimates for a model fitted to estimate variation in average medial prefrontal cortex volume. One outlier -5sd from the mean of cortisol AUCg was removed.

| Outcome = Bilateral mPFC Volume          |         |                |       |        |
|------------------------------------------|---------|----------------|-------|--------|
| Predictor                                | $\beta$ | 95% CI         | t     | p      |
| Intercept                                | 0.01    | [-0.05, 0.08]  | 2.68  | 0.008  |
| Cortisol Intercept                       | -0.01   | [-0.08, 0.06]  | -0.55 | 0.585  |
| Disadvantage Factor                      | 0.11    | [0.03, 0.2]    | 1.96  | 0.051  |
| Infant Age at Scan                       | -0.15   | [-0.23, -0.07] | -3.68 | <0.001 |
| Infant Sex                               | 0.03    | [-0.04, 0.1]   | 0.75  | 0.451  |
| Infant Birthweight                       | 0.02    | [-0.06, 0.1]   | 0.51  | 0.610  |
| Total Gray Matter Volume                 | 0.99    | [0.89, 1.08]   | 19.83 | <0.001 |
| Maternal Tobacco Use                     | 0.00    | [-0.07, 0.07]  | 0.13  | 0.899  |
| Maternal Cannabis Use                    | -0.04   | [-0.11, 0.04]  | -0.95 | 0.345  |
| Cortisol Intercept x Disadvantage Factor | -0.07   | [-0.14, 0]     | -1.88 | 0.061  |

### *Specificity analyses*

The maternal psychosocial stress factor score was also used as a predictor of neonatal amygdala volume to assess the specificity of maternal cortisol production as a predictor of neonatal brain volumes. Maternal psychosocial stress was not a significant predictor of the relationship between maternal cortisol AUCg and neonatal amygdala volume. Table S20 contains the results for this model.

**Table S20.** Coefficient-level estimates for a model fitted to estimate variation in average amygdala volume. One outlier -5sd from the mean of cortisol AUCg was removed.

| Predictor                                        | $\beta$ | 95% CI         | t     | p      |
|--------------------------------------------------|---------|----------------|-------|--------|
| Intercept                                        | -0.01   | [-0.09, 0.07]  | 3.27  | 0.001  |
| Psychosocial Stress Factor                       | 0.04    | [-0.05, 0.13]  | 1.01  | 0.315  |
| Disadvantage Factor                              | -0.13   | [-0.22, -0.03] | -2.48 | 0.014  |
| Infant Age at Scan                               | -0.02   | [-0.11, 0.07]  | -0.33 | 0.738  |
| Infant Sex                                       | -0.12   | [-0.2, -0.05]  | -3.12 | 0.002  |
| Infant Birthweight                               | -0.06   | [-0.15, 0.03]  | -1.37 | 0.172  |
| Total Gray Matter Volume                         | 0.77    | [0.66, 0.88]   | 14.27 | <0.001 |
| Psychosocial Stress Factor x Disadvantage Factor | 0.02    | [-0.07, 0.11]  | 0.49  | 0.622  |



**Assessment of Sex Differences.** Given previous research reporting female-specific effects of prenatal maternal cortisol on offspring amygdala volumes (34), we also investigated an outcome model with a cortisol by infant sex interaction term. There was no evidence of an infant sex difference in the relationship between prenatal maternal cortisol and neonatal amygdala volumes (interaction  $p=0.89$ ). Further, when both the cortisol by sex interaction term and the interaction of cortisol with the socioeconomic disadvantage factor were included in the same model, the focal interaction term remained significant with no evidence in support of a sex differentiated effect (see Table S21). Finally, neither the interaction between sex and socioeconomic disadvantage nor a three-way interaction between sex, socioeconomic disadvantage, and cortisol slope were associated with amygdala volume (see Tables S22 and S23).

**Table S21.** Coefficient-level estimates for a model fitted to estimate variation in average amygdala volume including interaction terms for both infant sex and socioeconomic disadvantage factor. One outlier -5sd from the mean of cortisol AUCg was removed.

| Outcome = Bilateral Amygdala Volume  |         |                |       |        |
|--------------------------------------|---------|----------------|-------|--------|
| Predictor                            | $\beta$ | 95% CI         | t     | p      |
| Intercept                            | 0.01    | [-0.06, 0.08]  | 3.72  | <0.001 |
| Cortisol Slope                       | 0.04    | [-0.04, 0.11]  | -1.00 | 0.317  |
| Disadvantage Factor                  | -0.15   | [-0.24, -0.05] | 2.20  | 0.029  |
| Infant Age at Scan                   | -0.03   | [-0.12, 0.06]  | -0.75 | 0.456  |
| Infant Sex                           | -0.10   | [-0.18, -0.02] | -2.11 | 0.036  |
| Infant Birthweight                   | -0.07   | [-0.15, 0.02]  | -1.57 | 0.117  |
| Maternal Tobacco Use                 | 0.77    | [0.67, 0.88]   | 14.25 | <0.001 |
| Maternal Cannabis Use                | -0.08   | [-0.16, 0]     | -2.05 | 0.041  |
| Total Gray Matter Volume             | 0.08    | [-0.01, 0.16]  | 1.84  | 0.068  |
| Cortisol Slope x Infant Sex          | 0.05    | [-0.03, 0.12]  | 1.23  | 0.220  |
| Cortisol Slope x Disadvantage Factor | -0.16   | [-0.24, -0.08] | -3.81 | <0.001 |

**Table S22.** Coefficient-level estimates for a model fitted to estimate variation in average amygdala volume including and interaction term for infant sex and socioeconomic disadvantage factor. One outlier -5sd from the mean of cortisol AUCg was removed.

| Outcome = Bilateral Amygdala Volume |         |                |       |        |
|-------------------------------------|---------|----------------|-------|--------|
| Predictor                           | $\beta$ | 95% CI         | t     | p      |
| Intercept                           | 0.00    | [-0.07, 0.07]  | 3.54  | <0.001 |
| Cortisol Slope                      | 0.01    | [-0.07, 0.08]  | 0.25  | 0.802  |
| Disadvantage Factor                 | -0.13   | [-0.22, -0.04] | -0.88 | 0.377  |
| Infant Age at Scan                  | -0.04   | [-0.13, 0.05]  | -0.80 | 0.422  |
| Infant Sex                          | -0.09   | [-0.17, -0.01] | -2.29 | 0.023  |
| Infant Birthweight                  | -0.07   | [-0.16, 0.01]  | -1.68 | 0.094  |
| Maternal Tobacco Use                | 0.79    | [0.68, 0.9]    | 14.09 | <0.001 |
| Maternal Cannabis Use               | -0.09   | [-0.17, -0.01] | -2.23 | 0.027  |
| Total Gray Matter Volume            | 0.06    | [-0.02, 0.15]  | 1.41  | 0.161  |
| Disadvantage Factor x Child Sex     | -0.01   | [-0.08, 0.07]  | -0.24 | 0.811  |

**Table S23.** Coefficient-level estimates for a model fitted to estimate variation in average amygdala volume including and a three-way interaction term with infant sex, socioeconomic disadvantage factor, and cortisol slope included. One outlier -5sd from the mean of cortisol AUCg was removed.

| Outcome = Bilateral Amygdala Volume              |         |                |       |        |
|--------------------------------------------------|---------|----------------|-------|--------|
| Predictor                                        | $\beta$ | 95% CI         | t     | p      |
| Intercept                                        | 0.01    | [-0.06, 0.08]  | 3.74  | <0.001 |
| Cortisol Slope                                   | 0.05    | [-0.03, 0.13]  | -1.06 | 0.289  |
| Disadvantage Factor                              | -0.15   | [-0.24, -0.05] | 0.26  | 0.794  |
| Infant Age at Scan                               | -0.04   | [-0.13, 0.05]  | -0.80 | 0.427  |
| Infant Sex                                       | -0.09   | [-0.17, -0.02] | -2.18 | 0.030  |
| Infant Birthweight                               | -0.07   | [-0.15, 0.02]  | -1.53 | 0.127  |
| Total Gray Matter Volume                         | 0.78    | [0.67, 0.89]   | 14.10 | <0.001 |
| Maternal Tobacco Use                             | -0.08   | [-0.15, 0]     | -2.01 | 0.046  |
| Maternal Cannabis Use                            | 0.08    | [-0.01, 0.16]  | 1.85  | 0.066  |
| Cortisol Slope x Disadvantage Factor             | -0.17   | [-0.26, -0.08] | -0.67 | 0.502  |
| Cortisol Slope x Child Sex                       | 0.06    | [-0.03, 0.14]  | 1.34  | 0.181  |
| Disadvantage Factor x Child Sex                  | -0.01   | [-0.08, 0.06]  | 0.51  | 0.614  |
| Cortisol Slope x Disadvantage Factor x Child Sex | -0.03   | [-0.12, 0.06]  | -0.61 | 0.543  |

**Hemisphere-specific Models in Additional Regions of Interest.** To ensure that the decision to use bilateral volumes of the regions of interest did not affect our pattern of results, we also tested the primary outcome model in the left and right hemispheres separately for the hippocampus, caudate, and medial prefrontal cortex (mPFC). The results from these models can be found in Tables S24 – S29, below.

**Table S24.** Coefficient-level estimates for a model fitted to estimate variation in left hippocampus volume. One outlier -5sd from the mean of cortisol AUCg was removed.

| Outcome = Left Hippocampus Volume    |         |               |       |        |
|--------------------------------------|---------|---------------|-------|--------|
| Predictor                            | $\beta$ | 95% CI        | t     | p      |
| Intercept                            | 0.00    | [-0.1, 0.11]  | 0.85  | 0.396  |
| Cortisol Slope                       | 0.09    | [-0.02, 0.2]  | 1.41  | 0.161  |
| Disadvantage Factor                  | -0.08   | [-0.21, 0.06] | 0.73  | 0.468  |
| Infant Age at Scan                   | 0.05    | [-0.08, 0.19] | 0.78  | 0.434  |
| Infant Sex                           | -0.00   | [-0.12, 0.11] | -0.06 | 0.953  |
| Infant Birthweight                   | -0.04   | [-0.17, 0.08] | -0.69 | 0.491  |
| Total Gray Matter Volume             | 0.54    | [0.38, 0.71]  | 6.64  | <0.001 |
| Maternal Tobacco Use                 | -0.03   | [-0.15, 0.08] | -0.58 | 0.564  |
| Maternal Cannabis Use                | -0.01   | [-0.13, 0.12] | -0.15 | 0.884  |
| Cortisol Slope x Disadvantage Factor | -0.08   | [-0.2, 0.04]  | -1.32 | 0.187  |

**Table S25.** Coefficient-level estimates for a model fitted to estimate variation in right hippocampus volume. One outlier -5sd from the mean of cortisol AUCg was removed.

| Outcome = Right Hippocampus Volume   |         |               |       |        |
|--------------------------------------|---------|---------------|-------|--------|
| Predictor                            | $\beta$ | 95% CI        | t     | p      |
| Intercept                            | 0.00    | [-0.1, 0.11]  | 2.62  | 0.010  |
| Cortisol Slope                       | 0.12    | [0.01, 0.23]  | 2.03  | 0.044  |
| Disadvantage Factor                  | -0.11   | [-0.24, 0.03] | 0.72  | 0.475  |
| Infant Age at Scan                   | -0.06   | [-0.19, 0.07] | -0.86 | 0.391  |
| Infant Sex                           | 0.02    | [-0.1, 0.13]  | 0.31  | 0.757  |
| Infant Birthweight                   | -0.07   | [-0.2, 0.05]  | -1.15 | 0.252  |
| Total Gray Matter Volume             | 0.63    | [0.47, 0.78]  | 7.82  | <0.001 |
| Maternal Tobacco Use                 | -0.07   | [-0.18, 0.04] | -1.26 | 0.208  |
| Maternal Cannabis Use                | 0.00    | [-0.12, 0.12] | 0.01  | 0.990  |
| Cortisol Slope x Disadvantage Factor | -0.09   | [-0.21, 0.02] | -1.55 | 0.123  |

**Table S26.** Coefficient-level estimates for a model fitted to estimate variation in left caudate volume. One outlier -5sd from the mean of cortisol AUCg was removed.

| Outcome = Left Caudate Volume        |         |                |       |        |
|--------------------------------------|---------|----------------|-------|--------|
| Predictor                            | $\beta$ | 95% CI         | t     | p      |
| Intercept                            | 0.00    | [-0.1, 0.11]   | 0.98  | 0.326  |
| Cortisol Slope                       | -0.01   | [-0.12, 0.1]   | -0.31 | 0.755  |
| Disadvantage Factor                  | -0.18   | [-0.31, -0.04] | -0.74 | 0.462  |
| Infant Age at Scan                   | 0.03    | [-0.1, 0.17]   | 0.48  | 0.630  |
| Infant Sex                           | 0.02    | [-0.1, 0.14]   | 0.36  | 0.721  |
| Infant Birthweight                   | -0.03   | [-0.16, 0.1]   | -0.46 | 0.644  |
| Total Gray Matter Volume             | 0.52    | [0.36, 0.68]   | 6.40  | <0.001 |
| Maternal Tobacco Use                 | -0.09   | [-0.2, 0.02]   | -1.54 | 0.125  |
| Maternal Cannabis Use                | 0.07    | [-0.05, 0.19]  | 1.11  | 0.269  |
| Cortisol Slope x Disadvantage Factor | -0.03   | [-0.15, 0.09]  | -0.46 | 0.646  |

**Table S27.** Coefficient-level estimates for a model fitted to estimate variation in right caudate volume. One outlier -5sd from the mean of cortisol AUCg was removed.

| Outcome = Right Caudate Volume       |         |                |       |        |
|--------------------------------------|---------|----------------|-------|--------|
| Predictor                            | $\beta$ | 95% CI         | t     | p      |
| Intercept                            | 0.00    | [-0.1, 0.1]    | -0.47 | 0.639  |
| Cortisol Slope                       | -0.08   | [-0.18, 0.03]  | -1.52 | 0.129  |
| Disadvantage Factor                  | -0.12   | [-0.25, 0]     | -0.77 | 0.445  |
| Infant Age at Scan                   | 0.10    | [-0.02, 0.22]  | 1.62  | 0.106  |
| Infant Sex                           | -0.01   | [-0.11, 0.1]   | -0.12 | 0.907  |
| Infant Birthweight                   | 0.05    | [-0.07, 0.17]  | 0.85  | 0.394  |
| Total Gray Matter Volume             | 0.52    | [0.37, 0.67]   | 6.97  | <0.001 |
| Maternal Tobacco Use                 | -0.11   | [-0.22, -0.01] | -2.08 | 0.039  |
| Maternal Cannabis Use                | 0.06    | [-0.05, 0.18]  | 1.12  | 0.265  |
| Cortisol Slope x Disadvantage Factor | -0.01   | [-0.11, 0.1]   | -0.12 | 0.904  |

**Table S28.** Coefficient-level estimates for a model fitted to estimate variation in left mPFC volume. One outlier -5sd from the mean of cortisol AUCg was removed.

| Outcome = Left mPFC Volume           |         |                |       |        |
|--------------------------------------|---------|----------------|-------|--------|
| Predictor                            | $\beta$ | 95% CI         | t     | p      |
| Intercept                            | -0.00   | [-0.08, 0.07]  | 2.61  | 0.010  |
| Cortisol Slope                       | 0.02    | [-0.06, 0.1]   | 0.82  | 0.414  |
| Disadvantage Factor                  | 0.16    | [0.06, 0.25]   | -0.27 | 0.788  |
| Infant Age at Scan                   | -0.16   | [-0.26, -0.07] | -3.34 | <0.001 |
| Infant Sex                           | 0.07    | [-0.01, 0.15]  | 1.63  | 0.106  |
| Infant Birthweight                   | -0.01   | [-0.1, 0.08]   | -0.16 | 0.876  |
| Total Gray Matter Volume             | 0.98    | [0.87, 1.1]    | 17.05 | <0.001 |
| Maternal Tobacco Use                 | 0.03    | [-0.05, 0.11]  | 0.64  | 0.525  |
| Maternal Cannabis Use                | -0.05   | [-0.13, 0.04]  | -1.04 | 0.299  |
| Cortisol Slope x Disadvantage Factor | 0.08    | [0, 0.16]      | 1.86  | 0.064  |

**Table S29.** Coefficient-level estimates for a model fitted to estimate variation in right mPFC volume. One outlier -5sd from the mean of cortisol AUCg was removed.

| Outcome = Right mPFC Volume          |         |                |       |        |
|--------------------------------------|---------|----------------|-------|--------|
| Predictor                            | $\beta$ | 95% CI         | t     | p      |
| Intercept                            | -0.00   | [-0.08, 0.08]  | 2.93  | 0.004  |
| Cortisol Slope                       | 0.05    | [-0.02, 0.13]  | 1.41  | 0.161  |
| Disadvantage Factor                  | 0.06    | [-0.03, 0.16]  | 0.53  | 0.598  |
| Infant Age at Scan                   | -0.14   | [-0.24, -0.05] | -2.90 | 0.004  |
| Infant Sex                           | -0.00   | [-0.09, 0.08]  | -0.07 | 0.941  |
| Infant Birthweight                   | 0.04    | [-0.05, 0.13]  | 0.93  | 0.354  |
| Total Gray Matter Volume             | 0.89    | [0.78, 1.01]   | 15.35 | <0.001 |
| Maternal Tobacco Use                 | -0.03   | [-0.11, 0.05]  | -0.69 | 0.489  |
| Maternal Cannabis Use                | -0.04   | [-0.13, 0.05]  | -0.88 | 0.380  |
| Cortisol Slope x Disadvantage Factor | 0.00    | [-0.08, 0.09]  | 0.08  | 0.939  |

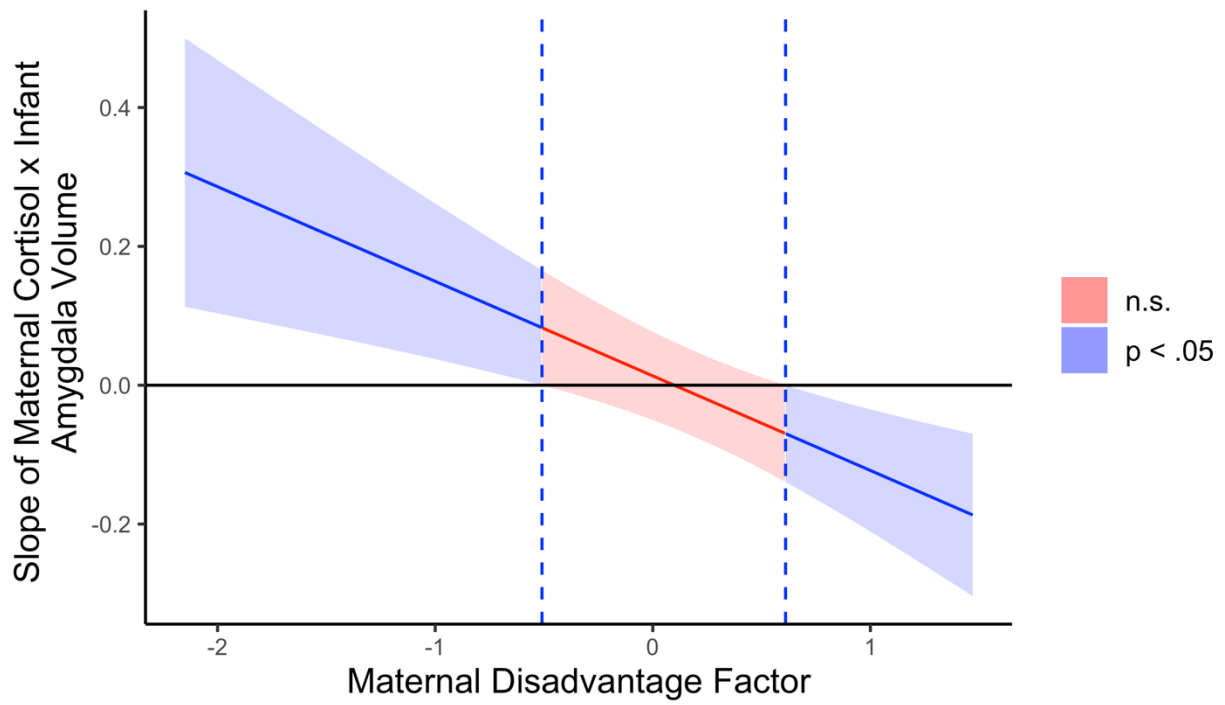

**Figure S2.** Johnson-Neyman plot of the interaction between socioeconomic disadvantage factor and cortisol slope across pregnancy.



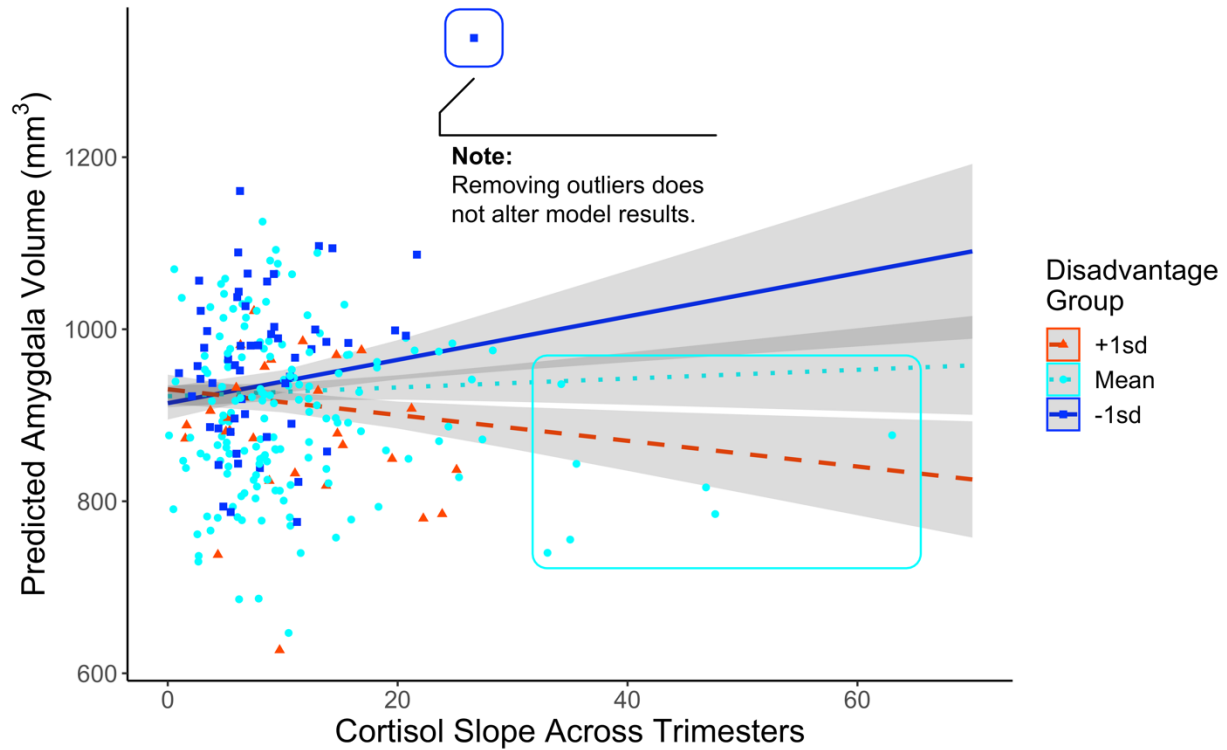

**Figure S3.** Neonatal amygdala volumes as a function of total maternal cortisol output slope across trimesters and socioeconomic disadvantage group with all data included. Lines represent model predicted results and points are the raw data included in the regression model. Gray shading indicates a 95% confidence interval. Categorical treatment of disadvantage group is for data visualization only. A continuous predictor was used to assess socioeconomic disadvantage in the regression model.

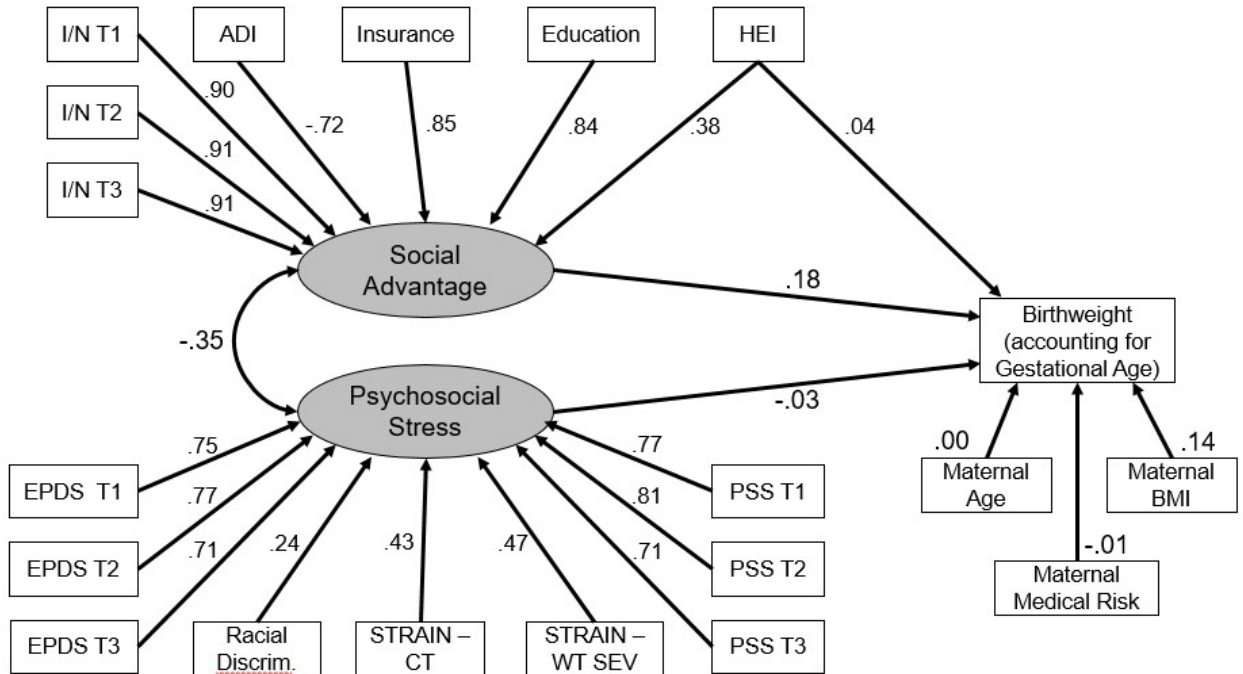

**Figure S4.** The structural equation model used to generate scores for social advantage and psychosocial stress. The social advantage score was reverse coded and used as the socioeconomic disadvantage score in these analyses. Some covariances are not included for clarity. (ADI = Area Deprivation Index; BMI = Body Mass Index; EPDS = Edinburgh Postpartum Depression Scale; HEI = Healthy Eating Index; I/N = Income/Needs; STRAIN-CT = Stressful Life Events Count; STRAIN\_WT SEV = Stressful Life Events Weighted Severity; PSS = Perceived Stress Scale; T1 – T3 = Trimester 1 – 3). Reprinted with permission from (1).

## Supplementary References

1. Luby JL, England SK, Barch DM, Warner B, Rogers C, Smyser C, *et al.* (*In Press*): Social disadvantage during pregnancy: Effects on gestational age and birthweight. *J Perinatol*.
2. Kind AJH, Buckingham WR (2018): Making neighborhood-disadvantage metrics accessible — The Neighborhood Atlas. *N Engl J Med* 378: 2456–2458.
3. University of Wisconsin School of Medicine and Public Health (2018): Area Deprivation Index (v.3).
4. National Cancer Institute (2017): The Healthy Eating Index - Population Ratio Method.
5. National Cancer Institute E and GRP (2012): Diet\*Calc Analysis Program [no. 1.5.0].
6. National Institutes of Health E and GRPNCI (2010): Diet History Questionnaire, Version 2.0.
7. Cohen S, Kamarck T, Mermelstein R (1983): A global measure of perceived stress. *J Health Soc Behav* 24: 385–396.
8. Cox JL, Holden JM, Sagovsky R (1987): Detection of postnatal depression: Development of the 10-item Edinburgh Postnatal Depression scale. *Br J Psychiatry* 150: 782–786.
9. Slavich GM, Shields GS (2018): Assessing lifetime stress exposure using the Stress and Adversity Inventory for Adults (Adult STRAIN): An overview and initial validation. *Psychosom Med* 80: 17–27.
10. Lewis TT, Yang FM, Jacobs EA, Fitchett G (2012): Racial/ethnic differences in responses to the everyday discrimination scale: A differential item functioning analysis. *Am J Epidemiol* 175: 391–401.
11. Muthén LK, Muthén BO (n.d.): Mplus User's Guide. Eighth Edition. Los Angeles, CA: Muthén & Muthén.

12. Laudat MH, Cerdas S, Fournier C, Guiban D, Guilhaume B, Luton JP (1988): Salivary cortisol measurement: A practical approach to assess pituitary-adrenal function. *J Clin Endocrinol Metab* 66: 343–348.
13. Pruessner JC, Kirschbaum C, Meinlschmid G, Hellhammer DH (2003): Two formulas for computation of the area under the curve represent measures of total hormone concentration versus time-dependent change. *Psychoneuroendocrinology* 28: 916–931.
14. Curran PJ, West SG, Finch JF (1996): The robustness of test statistics to nonnormality and specification error in confirmatory factor analysis. *Psychol Methods* 1: 16–29.
